# Supplementary material for: A cerebrospinal fluid microRNA analysis: Progressive supranuclear palsy
Source: PubMed Central journal article supplement — Mol Med Rep. 2022 Jan 14;25(3):88. doi: 10.3892/mmr.2022.12604 (PMC8809115; doi:10.3892/mmr.2022.12604), 2022-01-14
Supplement: Supplementary_Data.pdf [file Supplementary_Data.pdf]

Table SI. Clinical features of parkinsonian syndromes that are difficult to differentiate from progressive supranuclear palsy.

| Clinical feature                | PSP | PD  | MSA | CBD |
|---------------------------------|-----|-----|-----|-----|
| Asymmetric movement             | -   | ++  | -   | +++ |
| Axial rigidity                  | +++ | ++  | ++  | ++  |
| Limb dystonia                   | +   | +   | +   | +++ |
| Postural instability            | +++ | ++  | ++  | +   |
| Vertical gaze restriction       | +++ | +   | ++  | ++  |
| Frontal behavior                | +++ | +   | +   | ++  |
| Autonomic dysfunction           | -   | +   | ++  | -   |
| L-Dopa response early in course | +   | +++ | +   | -   |
| Asymmetrical cortical atrophy   | -   | -   | -   | ++  |

CBD, corticobasal degeneration; MSA, multiple system atrophy; PD, Parkinson's disease; PSP, progressive supranuclear palsy; -, negative; +, weak; ++, moderate; + + +, strong positive.
